# Supplementary material for: Coupling the fluorescence and adsorptive properties of biomass-based cellulose–CdS nanocomposite for the alleviation of water contaminants
Source: Royal Society of Chemistry journal article supplement (doi:10.1039/d1nj01925b), 2021-01-01
Supplement: d1nj01925b1.pdf [file d1nj01925b1.pdf]

**Coupling of fluorescence and adsorptive properties of biomass based cellulose-CdS nanocomposite for alleviation of water contaminants**

Komal<sup>a</sup>, Deepeka<sup>a</sup>, Jaspreet Kaur<sup>b</sup>, Vinod Kumar<sup>c</sup>, K.B. Tikoo<sup>c</sup>, Anupama Kaushik<sup>d\*</sup> and Sonal Singhal<sup>a\*</sup>

<sup>a</sup>Department of Chemistry & Centre of Advanced Studies in Chemistry, Panjab University, Chandigarh, India.

<sup>b</sup>Energy Research Centre, Panjab University, Chandigarh, India-160014.

<sup>c</sup>HR-TEM Facility Lab, National Institute of Pharmaceutical Education and Research (NIPER), SAS Nagar-160062, Punjab, India.

<sup>d</sup>Dr. S. S. Bhatnagar University Institute of Chemical Engineering and Technology, Panjab University, Chandigarh, India.

E-mail: [\\*sonal1174@gmail.com](mailto:*sonal1174@gmail.com); [sonal@pu.ac.in](mailto:sonal@pu.ac.in), [\\*anupamachem@gmail.com](mailto:*anupamachem@gmail.com)

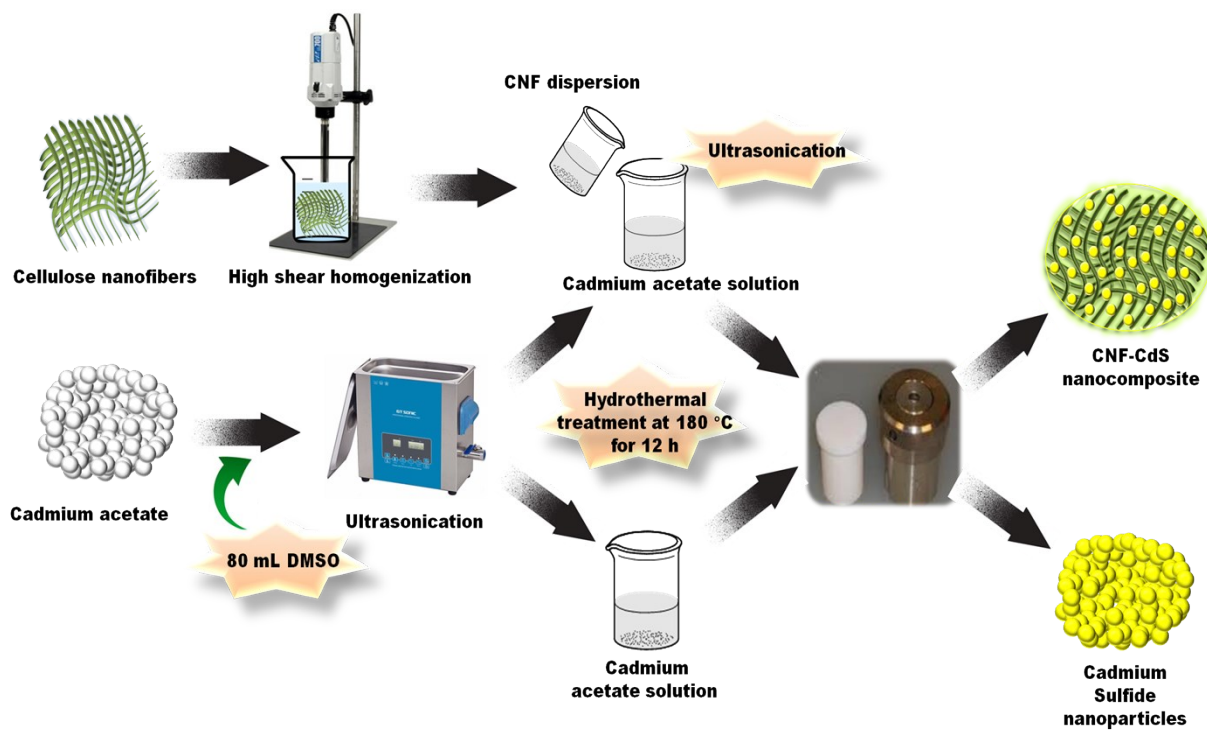

Fig. S1. Schematic illustration of synthetic methodology for CNF-CdS nanocomposite.

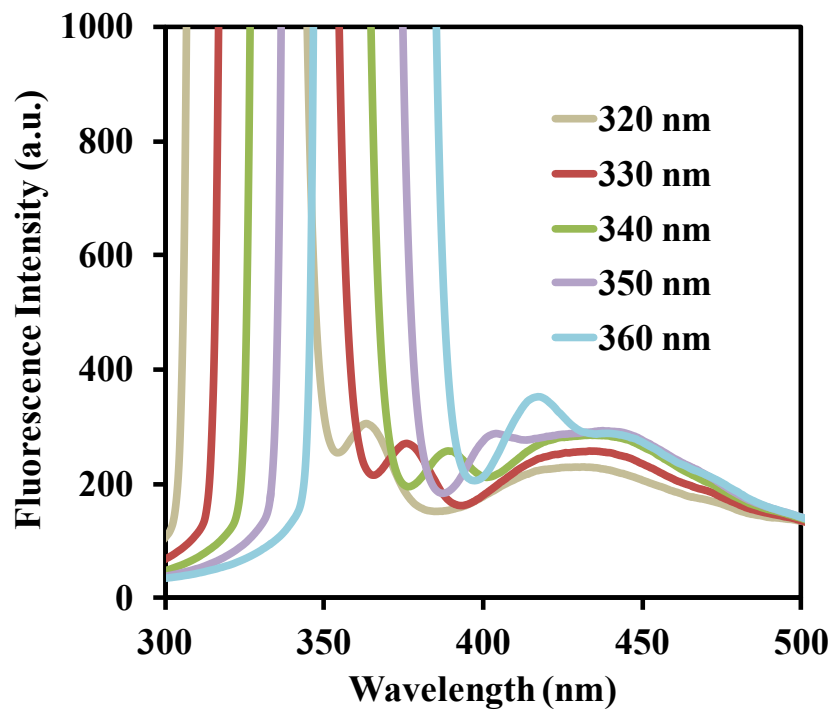

Fig.S2. Effect of excitation wavelength on emission spectra of CNF-CdS nanocomposite.

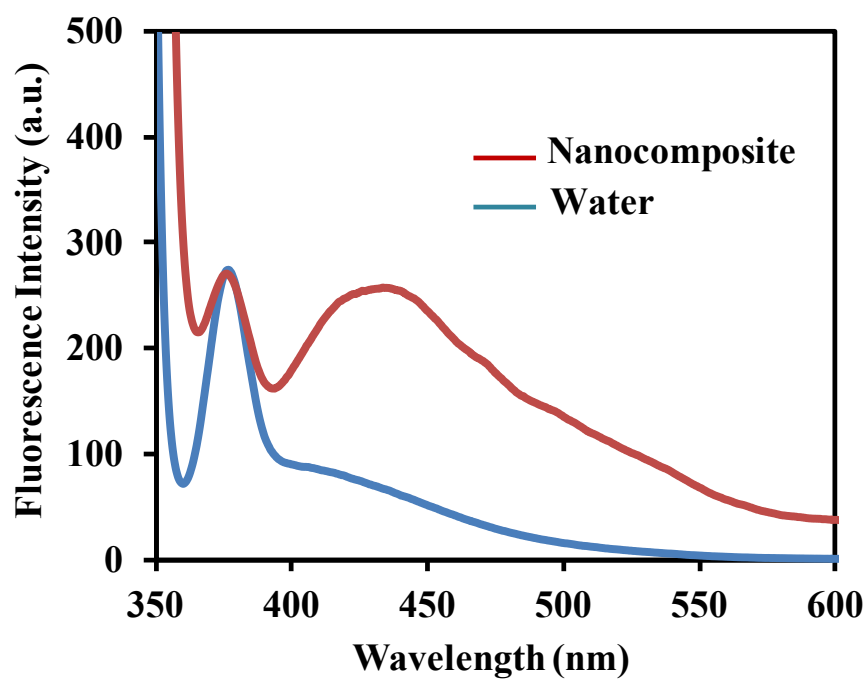

Fig.S3. Fluorescence emission spectra for CNF-CdS nanocomposite with respect to that of water.

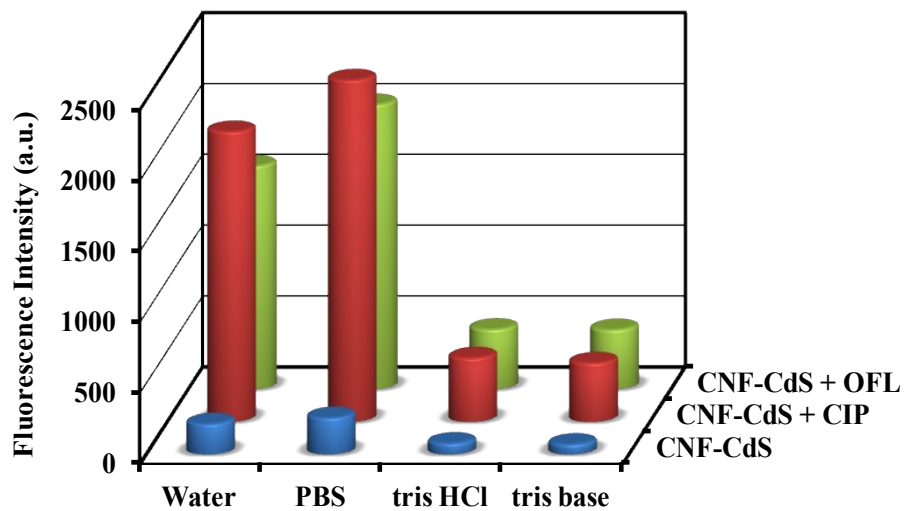

Fig. S4. Influence of buffer system on the fluorescence signal of CNF-CdS nanocomposite with and without the presence of fluoroquinolones.

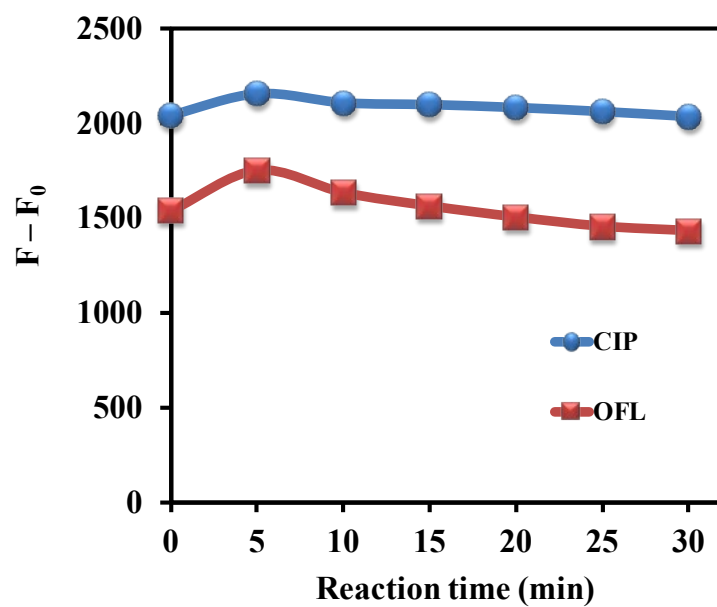

Fig. S5. Influence of reaction time on the fluorescence enhancement of CNF-CdS nanocomposite in the presence of fluoroquinolones.

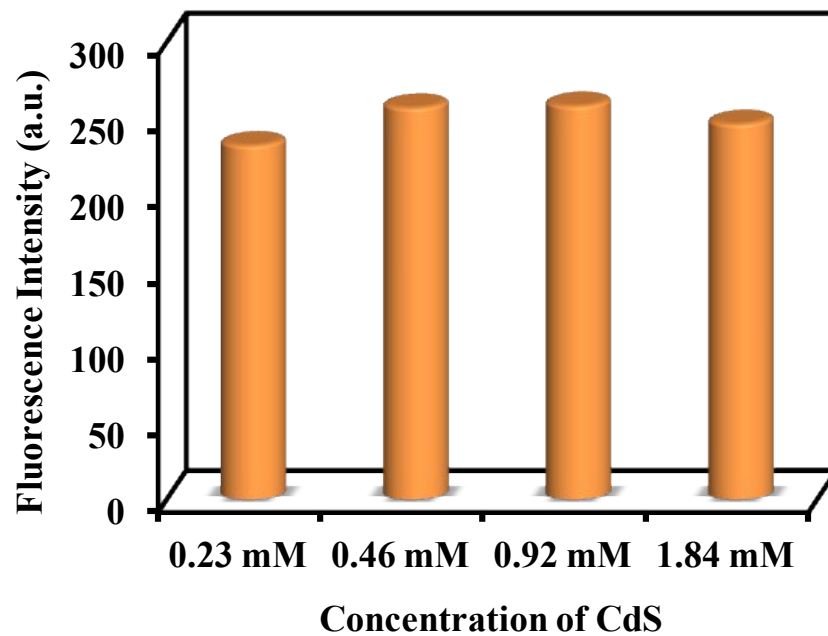

Fig. S6. Effect of concentration of CdS on the fluorescence intensity of CNF-CdS nanocomposite.

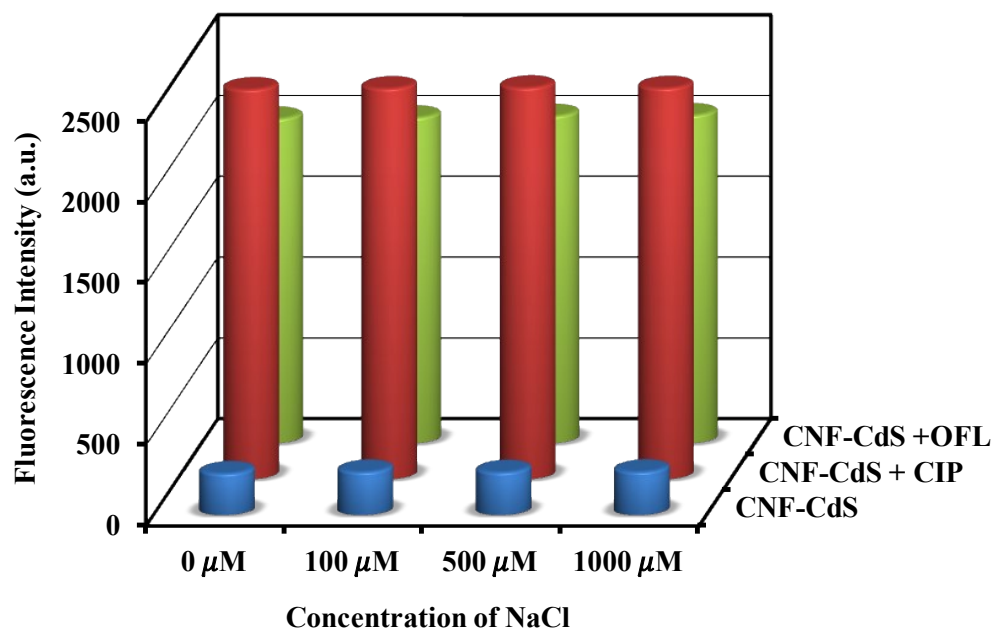

Fig. S7. Influence of electrolyte concentration on the fluorescence intensity of CNF-CdS nanocomposite in the absence and presence of fluoroquinolones.



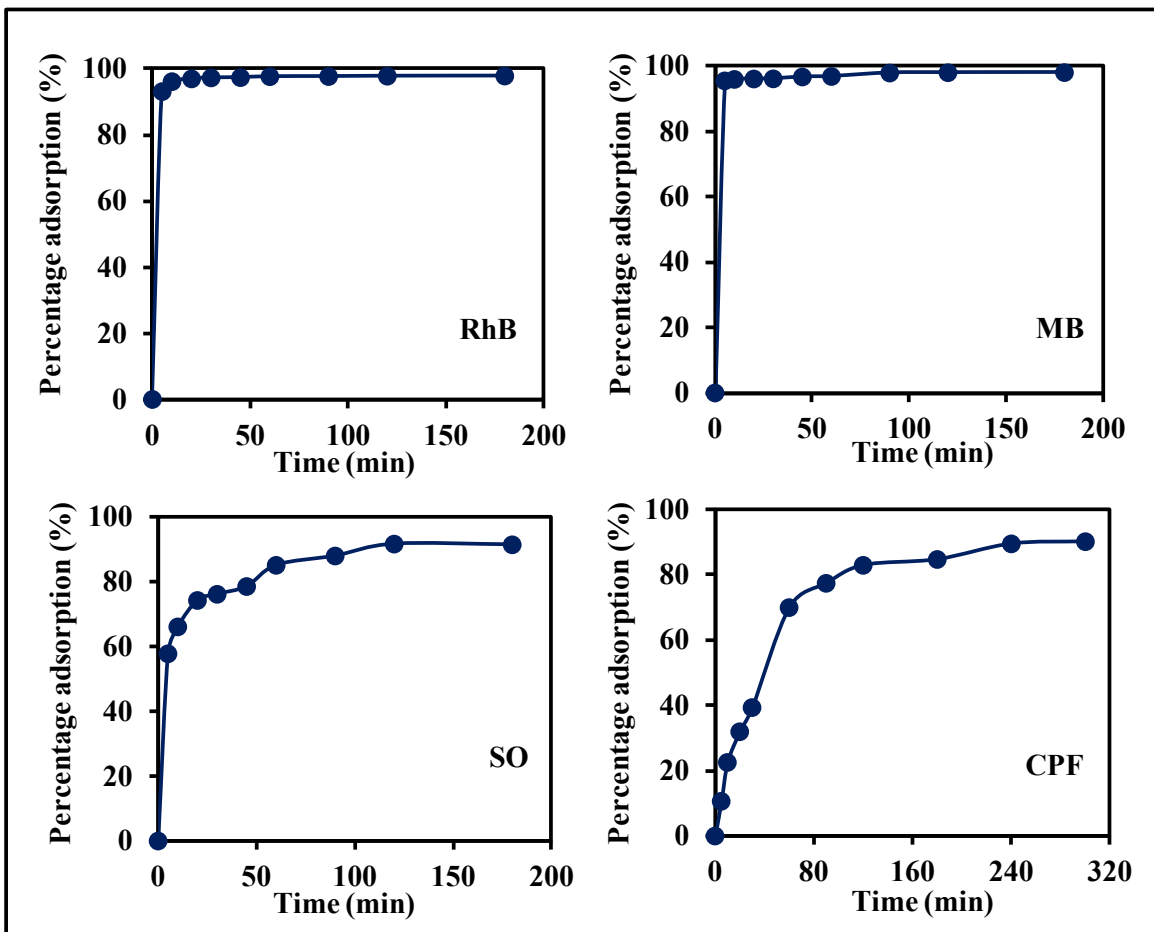

Fig. S8. Effect of contact time for the adsorption of pollutants over CNF-CdS nanocomposite.

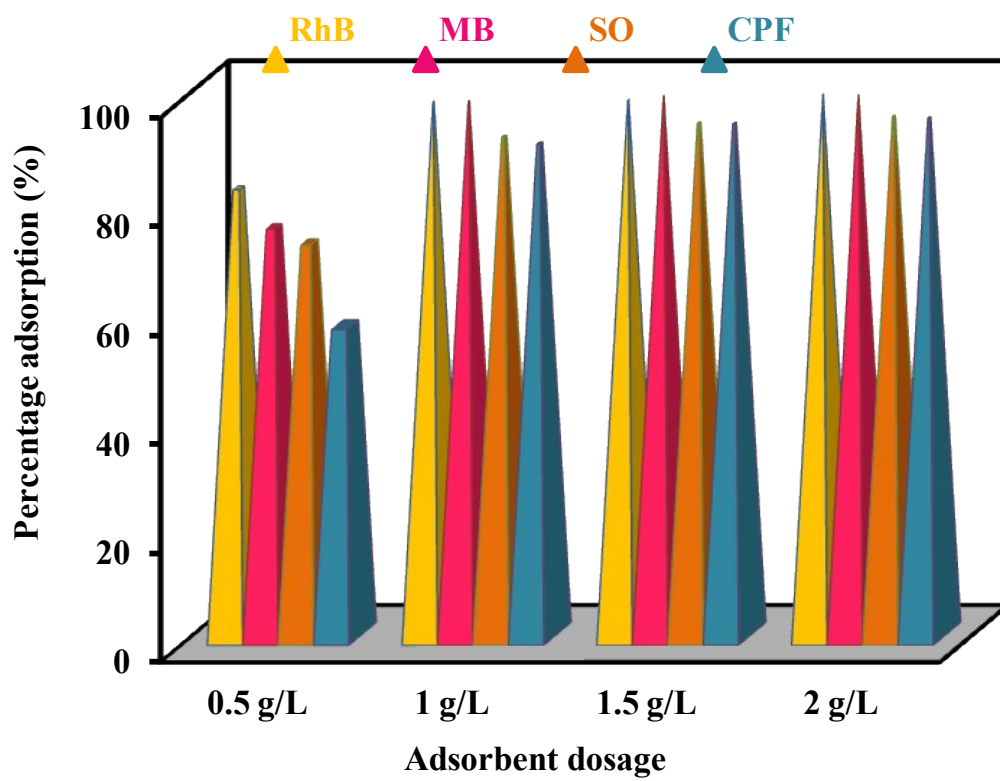

Fig. S9. Effect of adsorbent quantity for the adsorption of pollutants over CNF-CdS nanocomposite.

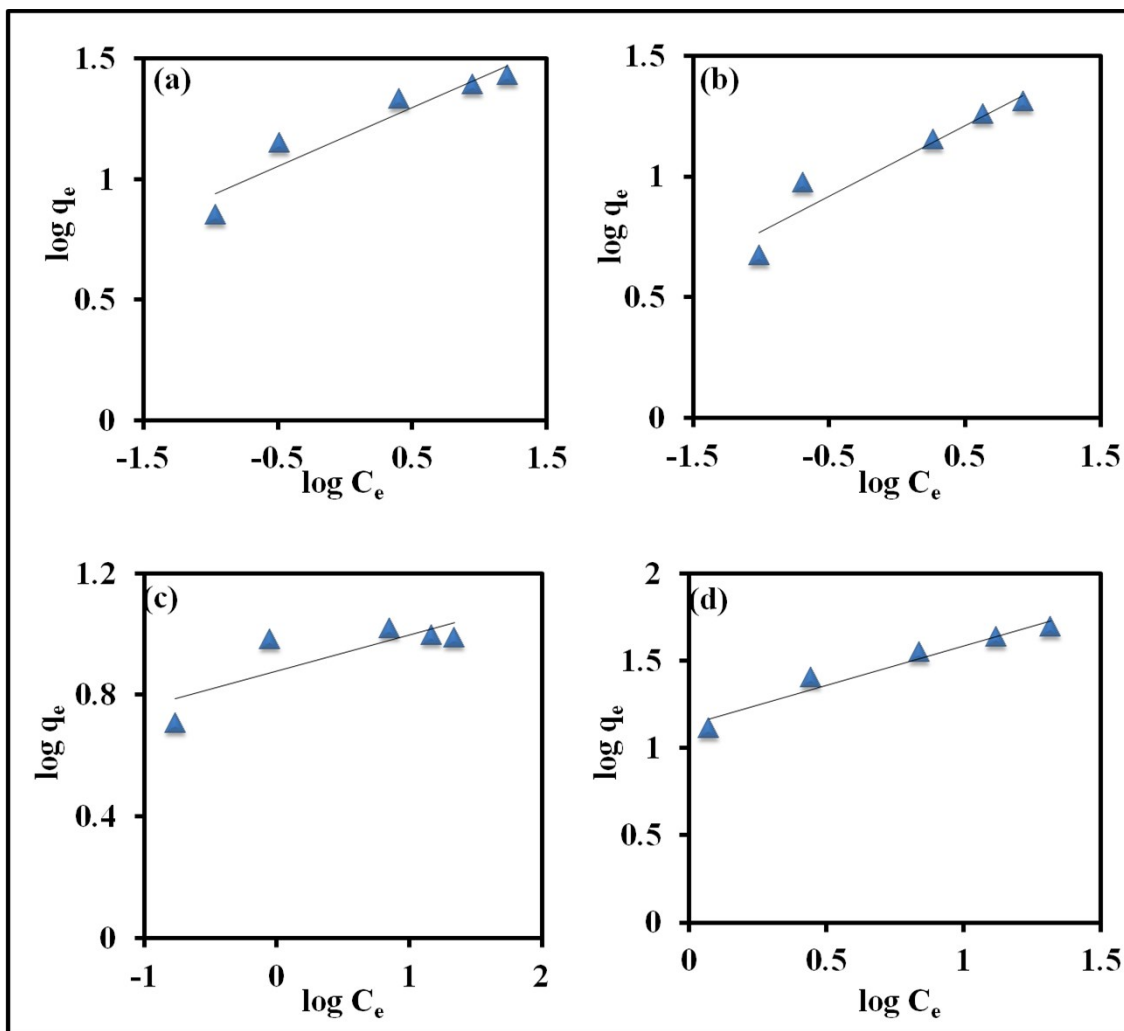

Fig. S10. Freundlich isotherm curves for (a) RhB, (b) MB, (c) SO and (d) CPF for adsorption over CNF-CdS nanocomposite.

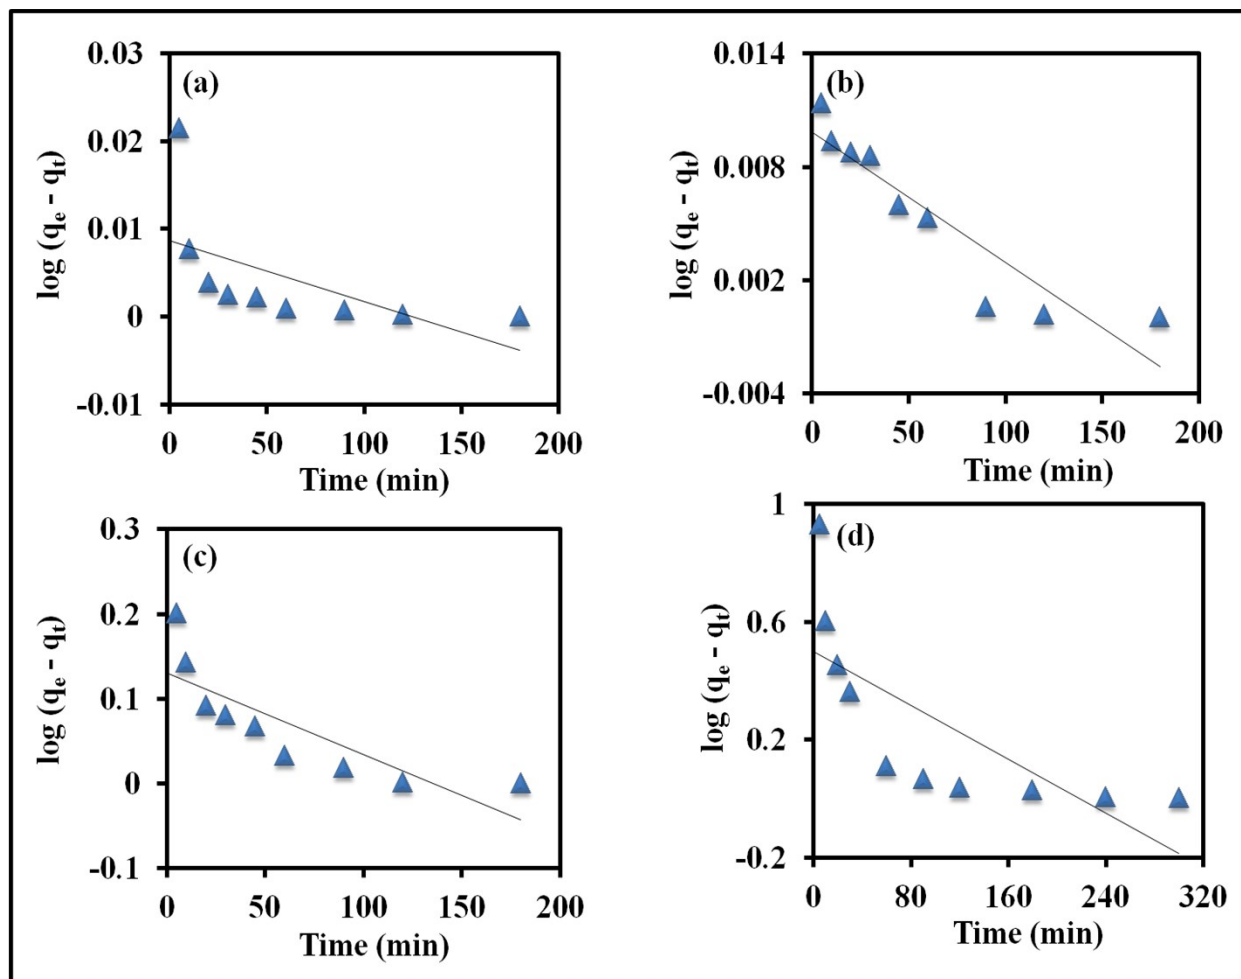

Fig. S11. Pseudo-first-order kinetic curves for (a) RhB, (b) MB, (c) SO and (d) CPF for adsorption over CNF-CdS nanocomposite.

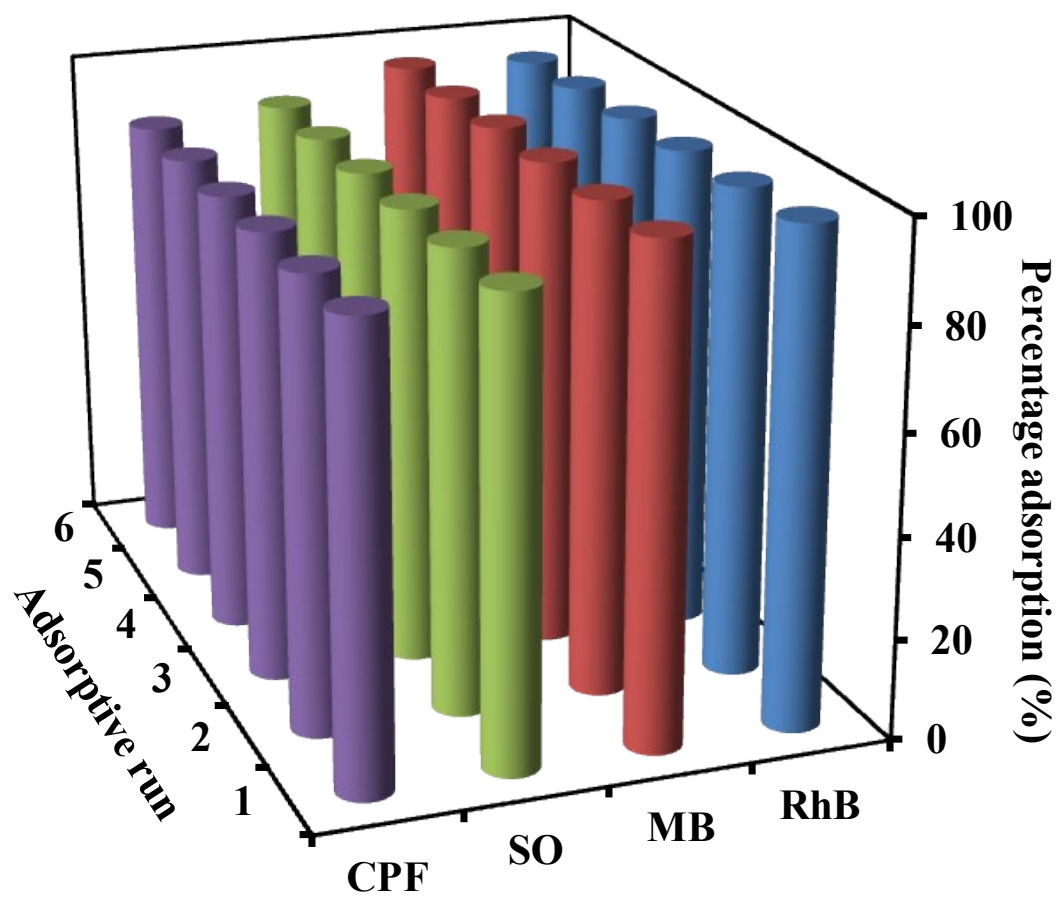

Fig. S12. Reusability studies for the adsorption of RhB, MB, SO nad CPF over CNF-CdS nanocomposite.

Table S1: Different parameters computed from pseudo-first-order and pseudo-second-order models for the adsorption of RhB, MB, SO and CPF onto the surface of CNF-CdS nanocomposite

| Pollutant  | Pseudo-first-order        |                         |        | Pseudo-second-order       |                                     |        |
|------------|---------------------------|-------------------------|--------|---------------------------|-------------------------------------|--------|
|            | $q_e$<br>( $mg\ g^{-1}$ ) | $k_1$<br>( $min^{-1}$ ) | $R^2$  | $q_e$<br>( $mg\ g^{-1}$ ) | $k_2$<br>( $g\ mg^{-1}\ min^{-1}$ ) | $R^2$  |
| <b>RhB</b> | 1.0199                    | 0.0001                  | 0.3477 | 14.0643                   | 0.4012                              | 1.0000 |
| <b>MB</b>  | 1.0230                    | 0.0001                  | 0.8497 | 9.4070                    | 0.2883                              | 1.0000 |
| <b>SO</b>  | 1.3486                    | 0.0023                  | 0.6824 | 9.8042                    | 0.0226                              | 0.9983 |
| <b>CPF</b> | 3.1557                    | 0.0053                  | 0.5520 | 27.9330                   | 0.0012                              | 0.9855 |
